# Supplementary material for: The Trajectory of Targets and Critical Lures in the Deese/Roediger–McDermott Paradigm: A Systematic Review
Source: PubMed Central journal article supplement (PMC8677658; doi:10.3389/fpsyg.2021.718818), 2021-12-03
Supplement: Image_1.pdf [file Image_1.pdf]

**Figure 1S**

*PRISMA Flowchart of Methodology By Identification, Screening and Final Included Studies.*

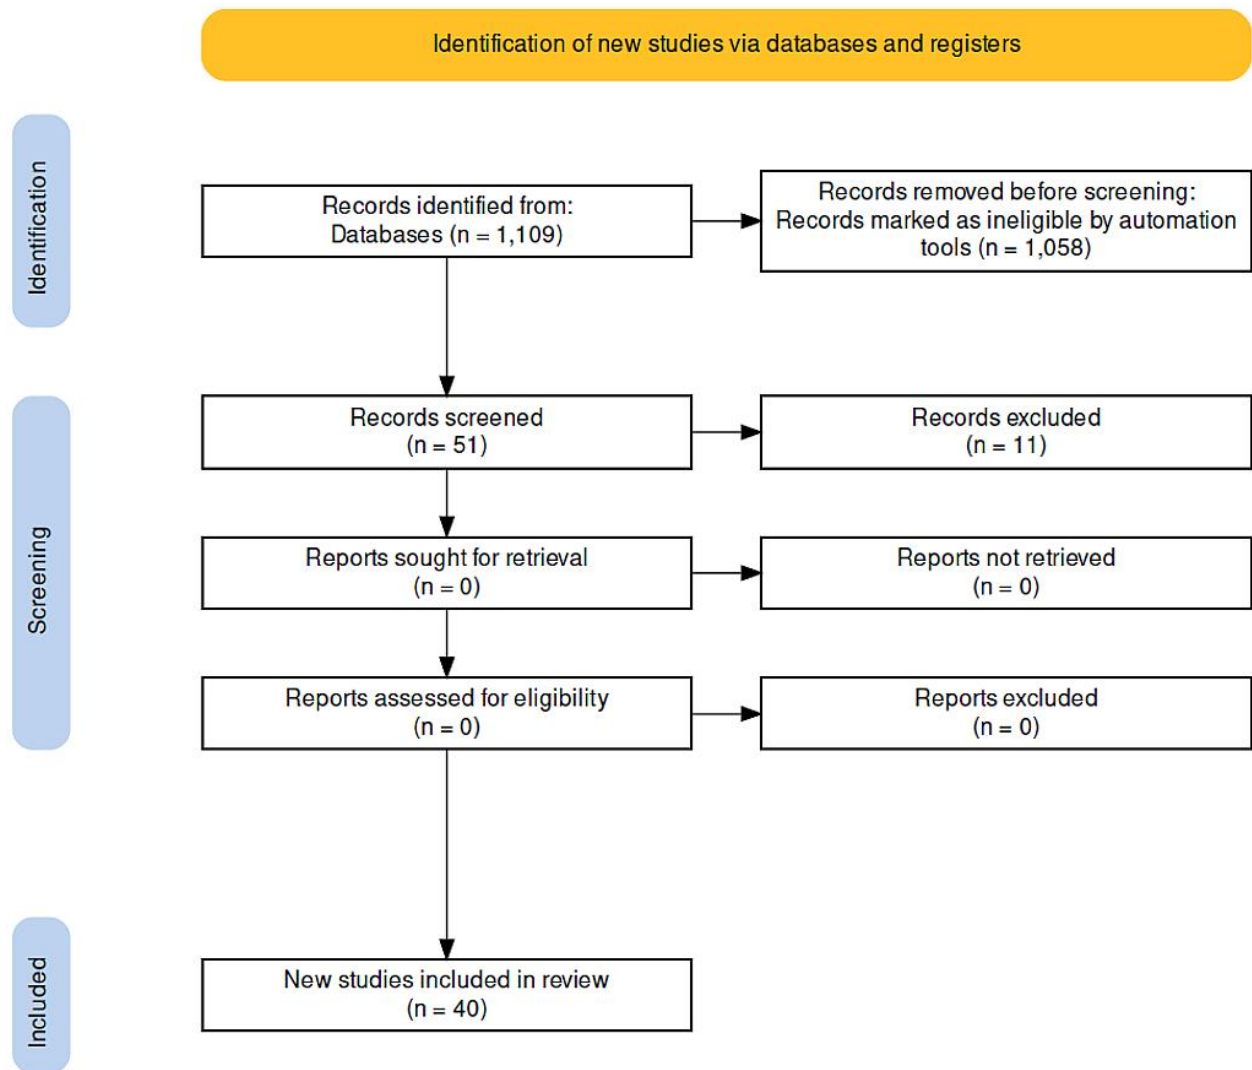

*Note.* Neal R Haddaway, Chris C Pritchard, Luke A McGuinness. (2021). PRISMA2020: R package and ShinyApp for producing PRISMA 2020 compliant flow diagrams. Zenodo. <http://doi.org/10.5281/zenodo.4287834>
